# Supplementary material
Source: HighWire-hosted journal article supplement (https://bmjopen.bmj.com/content/10/12/e041425)
Supplement: inline-supplementary-material-1 [file inline-supplementary-material-1.pdf]

|   | Framework point                                              | Facilitating transition of young people with long-term health conditions from children's to adults' healthcare services – implications of a 5-year research programme | NICE 2016 <sup>26</sup>             | National Policy and Strategy for the Provision of Neuro-Rehabilitation Services in Ireland                                                                                                                                                                                                                                                                                 | A National Model of Care for Paediatric Healthcare Services in Ireland                                                                                                                                                                                             |
|---|--------------------------------------------------------------|-----------------------------------------------------------------------------------------------------------------------------------------------------------------------|-------------------------------------|----------------------------------------------------------------------------------------------------------------------------------------------------------------------------------------------------------------------------------------------------------------------------------------------------------------------------------------------------------------------------|--------------------------------------------------------------------------------------------------------------------------------------------------------------------------------------------------------------------------------------------------------------------|
| 1 | A named worker                                               | 'key worker' <sup>25</sup>                                                                                                                                            | Section: 1.2.5 – 1.2.10             | 'Case management/key worker' (pg79) <sup>21</sup><br>'A case manager ' (pg52) <sup>28</sup>                                                                                                                                                                                                                                                                                | -                                                                                                                                                                                                                                                                  |
| 2 | Appropriate parental involvement                             | 'appropriate parent involvement' <sup>18 25</sup>                                                                                                                     | Section:1.2.19 -1.2.22              | 'Involvement of family and friends' (Fig 17; 8, pg55) <sup>28</sup>                                                                                                                                                                                                                                                                                                        | parents or guardians who will likely support and guide them through the process (pg7) <sup>22</sup>                                                                                                                                                                |
| 3 | Information provision which describes the transition process | 'a written transition plan' <sup>25</sup>                                                                                                                             | Section:1.2.4, 1.2.14, 1.3.4, 1.3.8 | 'effective communication and the provision of information, particular attention is needed during transition phases' (pg79) <sup>21</sup><br>'a written rehabilitation plan' (pg92) <sup>21</sup><br>'Information and education' (Fig 17; 8, pg55) <sup>21</sup>                                                                                                            | Effective information transfer (pg 6) <sup>22</sup><br>Appropriate planning to ensure seamless transition to adult services (pg 13,16) <sup>27</sup>                                                                                                               |
| 4 | Promotion of health self-efficacy                            | 'promotion of health self-efficacy' <sup>18 25</sup>                                                                                                                  | Section 1.1.4, 1.2.17, 1.2.21       | 'Supporting self-care'(pg 39) <sup>21</sup><br>'increase service users' skills and confidence in managing their health problems' (pg 61) <sup>28</sup>                                                                                                                                                                                                                     | -                                                                                                                                                                                                                                                                  |
| 5 | Promote opportunities for self-management                    | -                                                                                                                                                                     | Section: 1.1.4, 1.2.17, 1.3.5-1.3.7 | Promotes opportunities for 'self-management', where the individual is directly involved in planning and decision-making around their needs and takes responsibility for maintaining optimal health, functioning and participation (pg20) <sup>21</sup><br>Empowering and enabling people to have an active role in the management of their condition (pg 60) <sup>28</sup> | 'coaching patients and family members in disease self-management' (pg7) <sup>22</sup><br>'more responsibility for their own health care' (pg 6) <sup>22</sup><br>'encourage independence and reassess their understanding of their condition' (pg 7) <sup>22</sup> |

|   |                                                                                                                                                        |                                                                |                                       |                                                                                                                                        |                                                                                                                                                                                                                      |
|---|--------------------------------------------------------------------------------------------------------------------------------------------------------|----------------------------------------------------------------|---------------------------------------|----------------------------------------------------------------------------------------------------------------------------------------|----------------------------------------------------------------------------------------------------------------------------------------------------------------------------------------------------------------------|
| 6 | A health professional from the relevant adult services or primary care meets the young person before they transfer from child services.                | 'meet the adult team before transfer of care' <sup>18 25</sup> | Section: 1.3.1                        | -                                                                                                                                      | -                                                                                                                                                                                                                    |
| 7 | A senior manager with with responsibility for championing, implementing, monitoring and reviewing effectiveness of transition strategies and policies. | 'Transition manager for clinical team.' <sup>25</sup>          | Section 1.5.1-1.5.3                   | 'Rehabilitation Coordinator' (pg 52) <sup>28</sup>                                                                                     | -                                                                                                                                                                                                                    |
| 8 | Where there is no adult service for a young person to transfer to, a detailed discharge letter is sent to the young person's GP.                       | -                                                              | Section 1.1.8; 1.1.9; 1.3.9           | 'Role of GP, as the first point of contact for medical services and in linking to care pathways' (pg84) <sup>21</sup>                  | 'GPs may be consulted by young people during transition and asked to take on a wider role'. (Pg 6) <sup>22</sup>                                                                                                     |
| 9 | Formal life skills training relevant to health condition, in wider life skills - education, relationships, health maintenance etc.                     | 'holistic life-skills training'                                | Section: 1.2.8; 1.2.13, 1.2.15, 1.3.3 | 'Access to supports' (pg 47) <sup>28</sup><br>'Social prescribing' (pg 61) <sup>28</sup><br>'Vocational support' (pg 90) <sup>28</sup> | 'help with self-care and in developing their communication and decision making skills, to manage social, educational and employment opportunities and challenges as part of independent living' (pg 6) <sup>22</sup> |
